1  
2  
3  
4  
5  
6  
7  
8  
9  
10  
11  
12  
13  
14  
15  
16  
17  
18  
19  
20  
21  
22  
23  
24  
25  
26  
27  
28  
29

# Ultrastructural characterisation of young and aged dental enamel by atomic force microscopy

Camila Leiva-Sabadini<sup>1</sup>, Christina MAP Schuh<sup>2</sup>, Nelson P Barrera<sup>3</sup>, Sebastian Aguayo<sup>1,4\*</sup>

<sup>1</sup> School of Dentistry, Faculty of Medicine, Pontificia Universidad Católica de Chile, Santiago, Chile.

<sup>2</sup> Centro de Medicina Regenerativa, Facultad de Medicina Clínica Alemana-Universidad del Desarrollo, Santiago, Chile.

<sup>3</sup> Department of Physiology, Faculty of Biological Sciences, Pontificia Universidad Católica de Chile, Santiago, Chile.

<sup>4</sup> Institute for Biological and Medical Engineering, Schools of Engineering, Medicine and Biological Sciences, Pontificia Universidad Católica de Chile

**\*Corresponding author:**

**Dr. Sebastian Aguayo, DDS, PhD**

Assistant Professor

School of Dentistry, Faculty of Medicine, Pontificia Universidad Católica de Chile, Santiago, Chile.

Address: Marcoleta 391, Santiago, Chile, 8320000

Email: [Sebastian.aguayo@uc.cl](mailto:Sebastian.aguayo@uc.cl)

**Keywords:** atomic force microscopy, dentistry, dental enamel, biomaterials



31 **Abstract:**

32  
33 Recent advances in atomic force microscopy (AFM) have allowed the characterisation  
34 of dental-associated biomaterials and biological surfaces with high-resolution and  
35 minimal sample preparation. In this context, the topography of dental enamel – the  
36 hardest mineralised tissue in the body – has been explored with AFM-based  
37 approaches at the micro-scale. With age, teeth are known to suffer changes that can  
38 impact their structural stability and function; however, changes in enamel structure  
39 because of ageing have not yet been explored with nanoscale resolution. Therefore, the  
40 aim of this exploratory work was to optimise an approach to characterise the  
41 ultrastructure of dental enamel and determine potential differences in topography,  
42 hydroxyapatite (HA) crystal size, and surface roughness at the nanoscale associated to  
43 ageing. For this, a total of six teeth were collected from human donors from which  
44 enamel specimens were prepared. By employing AC mode imaging, HA crystals were  
45 characterised in both transversal and longitudinal orientation with high-resolution in  
46 environmental conditions. Sound superficial enamel displayed the presence of a  
47 pellicle-like coating on its surface, that was not observable on cleaned specimens. Acid-  
48 etching exposed crystals that were imaged and morphologically characterised in high-  
49 resolution at the nanoscale in both the external and internal regions of enamel in older  
50 and younger specimens. Our results demonstrated important individual variations in HA  
51 crystal width and roughness parameters across the analysed specimens; however, an  
52 increase in surface roughness and decrease in HA width was observed for the pooled  
53 older external enamel group compared to younger specimens. Overall, high-resolution  
54 AFM was an effective approach for the qualitative and quantitative characterisation of  
55 human dental enamel ultrastructure at the nanometre range. Future work should focus

56 on exploring the ageing of dental enamel with increased sample sizes to compensate  
57 for individual differences as well as other potential confounding factors such as  
58 behavioural habits and mechanical forces.

59

60

61

62

63

64

65

66

67

68

69 **1. Introduction:**

70 Human teeth are complex organs located in the oral cavity, made up by three  
71 mineralised tissues (enamel, dentin, cementum) and one non-mineralised tissue (dental  
72 pulp). Amongst these, dental enamel is the outermost mineralised layer that coats the  
73 visible crown portion of the tooth<sup>1,2</sup>. As such, it is in direct contact with the oral  
74 environment and thus is a crucial substrate for the chemical and mechanical protection  
75 of underlying tissues such as dentin and the dental pulp. It is mostly constituted by a  
76 mineral phase of hydroxyapatite (HA) – a form of calcium apatite - although there are  
77 also very minor amounts of specialised enamel proteins such as amelogenins and  
78 enamelin that act as scaffolding for mineralisation<sup>3</sup>. This high degree of mineralisation  
79 makes dental enamel the hardest tissue in the human body and grants it mechanical  
80 stability to endure cyclic force loading during repetitive mastication. Protein-protein and  
81 protein-mineral interactions regulate the morphology and three-dimensional orientation  
82 of hydroxyapatite crystals and determine the mechanical properties of enamel such as  
83 high surface hardness and resistance to fracture<sup>4,5</sup>.

84  
85 Within enamel, HA crystals are known to be ~50-70 nm wide and up to several microns  
86 in length<sup>6,7</sup>, and can be found aligned within anatomical structures known as enamel  
87 rods that enhance the mechanical properties of the tissue<sup>8</sup>. Besides being an important  
88 structural tissue, dental enamel is also an important substrate for the adhesion of  
89 biomaterials during restorative treatments. In recent years, the development of adhesive  
90 dentistry procedures allows the direct bonding of composite resin materials to tooth  
91 structures including enamel<sup>9</sup>. These techniques involve an initial demineralisation of the

92 enamel surface with phosphoric acid to controllably remove HA crystals. This leads to  
93 an increase in surface energy and microroughness and facilitates the formation of a  
94 strong restorative-tooth interphase that will increase the long-term success of treatment.  
95 As dental restorations can be placed either on superficial enamel or deeper within the  
96 tissue, the ultrastructure of enamel at different depths is clinically relevant and plays an  
97 important role in adhesive dentistry.

98

99 Currently, it is known that dental tissues can suffer important mechanical and biological  
100 changes with ageing. Some relevant ageing markers in teeth include dental pulp  
101 fibrosis<sup>10</sup>, dentinal sclerosis, and increased elasticity, as well as age-dependent  
102 accumulation of glycation end-products<sup>11</sup>. In enamel, age-associated alterations are  
103 mostly a result of cyclic exposure to mechanical forces (such as mastication) and  
104 erosion (due to dietary or intrinsic factors) that modify the structure and roughness of  
105 enamel over time<sup>9</sup>. Despite these observations, little is known regarding ageing-  
106 associated ultrastructural changes in enamel at the nanoscale that could potentially  
107 impact tissue mechanics, resistance to wear, and integration with restorative  
108 biomaterials.

109

110 In recent years, the use of atomic force microscopy (AFM) has allowed researchers to  
111 characterise biological substrates and tissues with nanoscale resolution<sup>12,13</sup>. For AFM,  
112 samples require minimal preparation and can be observed in near-physiological  
113 conditions, resulting in huge advantages for the exploration of human tissue samples  
114 and specimens<sup>14</sup>. Furthermore, AFM is not limited to topographical characterisation as it

115 can also provide important quantitative information such as surface roughness and  
116 mechanical properties of specimens and substrates<sup>15</sup>. Previous work has utilised AFM  
117 to examine the microstructure of enamel surfaces after acid etching but mostly focused  
118 on observing changes at the microscale range<sup>16–18</sup>; however, potential enamel  
119 ultrastructural changes associated to tooth ageing have not yet been explored with  
120 these techniques.

121

122 Thus, the aim of this exploratory work was to optimise an approach to characterise the  
123 ultrastructure of dental enamel with nanoscale resolution in both younger and older  
124 tooth specimens, in order to determine potential differences in topography, HA crystal  
125 size, and surface roughness at the nanoscale. Overall, understanding potential changes  
126 in enamel ultrastructure between younger and older tooth specimens could potentially  
127 aid in the development of novel therapeutic approaches regarding adhesive dentistry  
128 focused on the elderly.

129

## 130 **2. Materials and methods:**

### 131 **2.1. Sample collection:**

132 For enamel specimen collection, a total of 6 permanent teeth extracted due to  
133 orthodontic or restorative treatment were obtained following informed consent (local  
134 ethical approval #180426002). All tooth samples presented sound enamel at the  
135 moment of extraction with the absence of restorations or active caries. Teeth were  
136 initially washed and stored in 70% ethanol solution for 72 hours for decontamination,  
137 washed 3x in PBS, and air-dried.

138

139

## 140 **2.2. Specimen preparation:**

141 Following sample collection, teeth were embedded in acrylic resin (Marche Acrylics,  
142 Chile) and sectioned transversally with an SP1600 hard tissue microtome (Leica  
143 Biosystems, US) to obtain 200  $\mu\text{m}$  specimens for each tooth. After sectioning, tooth  
144 samples were treated with a 37% phosphoric acid solution (Sigma-Aldrich, US) for 30  
145 sec, washed 3x with ultrapure water ( $\text{dH}_2\text{O}$ ), and air-dried. Furthermore, non-sectioned  
146 enamel specimens, corresponding to non-occlusal regions for each tooth, were also  
147 collected to directly visualise the external surface of enamel.

148

149 Initial specimen characterisation was carried out with light microscopy and scanning  
150 electron microscopy (SEM). Briefly, specimens were immobilised onto glass cover  
151 slides and visualised with a Panthera U (Motic, China) light microscope, obtaining  
152 images at 4x and 10x magnification. Subsequently, selected specimens were  
153 submerged in a solution of 2.5% glutaraldehyde for 24 hours, dehydrated with an  
154 increasing 25%, 50%, 70%, 90%, 100% ethanol series, gold sputter-coated, and  
155 imaged with a Hitachi TM3000 SEM (Tokyo, Japan) with an acceleration voltage of 5  
156 kV.

157

## 158 **2.3. Atomic force microscopy (AFM):**

159 All AFM experiments were performed with an Asylum MFP 3D-SA AFM (Asylum  
160 Research, US) in intermittent contact (AC mode) under environmental conditions,



161 utilising SCOUT 350 RAu probes (NuNano, Bristol, United Kingdom). Briefly, superficial  
162 and sectioned enamel specimens were cleaned with a stream of N<sub>2</sub> air and immobilised  
163 onto metal discs with the aid of double-sided tape. Initial exploratory 10x10 µm scans  
164 were performed on each sample, from where 1x1 µm representative images were  
165 obtained for nanoscale visualisation. Height, amplitude, and phase channels were  
166 recorded, and gain parameters were adjusted in real time to optimise image acquisition  
167 at 256x256 pixels. For sectioned specimens, images were acquired at both external  
168 (adjacent to the enamel surface) and internal (adjacent to the dentin-enamel junction)  
169 regions of enamel for each specimen. A total of 3 representative images were acquired  
170 for each specimen at each location.

#### 171 **2.4. Data and statistical analysis:**

172 All AFM images were processed with the Gwyddion 2.6 software. Selected trace profiles  
173 and 3D images were obtained from the height channel. HA crystal sizes were measured  
174 and determined with ImageJ Fiji v2.3.0 software and graphed as violin plots (median  
175 and quartiles) in Graphpad Prism 9. RMS roughness was determined in Gwyddion  
176 across three independent 1x1 µm scans per specimen and expressed as mean ±  
177 standard deviation. Normality tests and statistical analysis were performed in Graphpad  
178 Prism 9 software with either one-way ANOVA with Tukey's multiple comparisons, or  
179 Kruskal-Wallis test with Dunn's multiple comparison tests, considering significance at p  
180 values <0.05.

181

182

### 183 **3. Results and Discussion:**

#### 184 **3.1. Characterisation of superficial human enamel:**

185 For this exploratory study, we obtained dental enamel specimens from a total of 6  
186 donors from two different age groups. All employed teeth were free of dental caries  
187 lesions, evident chemical modifications, or previous restorative procedures. Three of the  
188 samples were obtained from younger individuals (20-26 years old), whereas the other  
189 three samples were collected from older individuals (50-69 years old). For all cases, an  
190 appropriate amount of tooth slices (specimens) was obtained via hard tissue microtome  
191 sectioning, and sound enamel was also obtained for superficial sample characterisation.

192  
193 Enamel is the most external tissue covering the surface of the tooth, and as such, it lies  
194 in direct contact with the oral microenvironment<sup>19</sup>. Thus, as an initial step, the  
195 visualisation of human enamel with AC mode AFM was done directly on the tooth  
196 surface before any cleaning procedure. As such, the presence of a pellicle-like structure  
197 was observed directly on top of the surface of enamel (**Figures 1A and 1B**). This can  
198 be better observed with the phase channel that highlights the differences in  
199 physicochemical properties between the pellicle and parts of the underlying enamel  
200 surface that are visible (**Figures 1C and 1D**). It is known that within the oral cavity,  
201 enamel is coated with a pellicle consisting of salivary proteins and other  
202 macromolecules such as amylase, mucin, and lipids, amongst others<sup>20</sup>. Therefore, the  
203 presence of a pellicle-like structure on the surface of extracted human tooth enamel is  
204 expected during the direct examination under AFM with no previous sample preparation  
205 or cleaning. It remains likely that the pellicle observed in the present samples may be

206 due to minor remnants of the salivary pellicle that survived sample preparation, as  
207 previous work has shown that intact salivary pellicles can form clusters up to 80nm  
208 height when observed with AFM<sup>21</sup>.

209  
210 After pellicle removal by surface cleaning with dH<sub>2</sub>O and N<sub>2</sub> airflow, the morphology of  
211 enamel was clearly observed in the form of HA crystals, which displayed a globular  
212 aspect in high-magnification AFM images (**Figure 1**). Furthermore, enamel in the  
213 younger specimen presented clearly demarcated HA crystals on the surface (**Figures**  
214 **1E and 1F**), while the older specimen appeared to have less defined HA crystals with  
215 fewer variations in surface morphology as observed in height and amplitude images  
216 (**Figures 1G and 1H**). This observation could potentially be explained by the  
217 progressive changes that enamel undergoes during life due to chemical, bacterial, or  
218 mechanical factors that can alter its surface morphology<sup>22,23</sup>. Therefore, as enamel is a  
219 tissue that once deposited cannot be remodelled or regenerated, the cumulative effect  
220 of damage over the years results in surface modifications that can be observed with  
221 diverse microscopy approaches<sup>24</sup>. As such, the observation that older enamel is  
222 smoother and has less defined HA crystals is expected; but nevertheless, the  
223 examination of enamel samples across a wider range of individuals is necessary in the  
224 future in order to determine the reproducibility of these observations at a larger  
225 population-based level.

226

227 **3.2. Ultrastructure of enamel from tooth cross-sections:**

228 As a second step, tooth specimens were sectioned into 200  $\mu\text{m}$  slices and  
229 demineralised with a solution of 37% phosphoric acid for 30sec. This demineralisation  
230 process is customary during the restorative dental treatment when utilising composite  
231 resin-based materials, in order to expose fresh HA crystals on the surface and increase  
232 surface energy and micro-retention<sup>25,26</sup>. This process is crucial for the correct adhesion  
233 of the restorative material to the enamel surface and long-term restoration survival.  
234 Therefore, the resulting sections utilised in this study are representative of clinical  
235 enamel surface preparation found in the everyday restorative dentistry setting.

236  
237 For an initial microscale characterisation, SEM imaging was employed that confirmed  
238 etching of enamel by HA removal and showed that different etching morphologies and  
239 crystal orientations can be present within one sample (**Figure 2A-D**, obtained from a  
240 younger specimen). Correspondingly, when HA crystals are sectioned across their  
241 width, they are observed in a globular fashion under AFM similar to the images  
242 observed for superficial sound enamel (**Figure 2E and 2F**). Obtaining surface profiles  
243 from AFM height images confirms the globular shape and overall dimensions of HA  
244 crystals, with a representative size of  $<80\text{nm}$  (**Figure 2G and 2H**). On the other hand,  
245 when crystals were sectioned and exposed longitudinally after acid etching, they were  
246 observed in a rod-like fashion under the AFM with lengths  $<200\text{ nm}$ , consistent with the  
247 expected length for individual HA crystals reported previously in the literature (**Figure**  
248 **2I-L**)<sup>27</sup>. However, it is known that enamel crystals can reach much higher lengths  
249 according to their location within the tissue<sup>8,27</sup>. Nevertheless, the characterisation of HA  
250 crystal length was not within the scope of this particular work and therefore, only regions

251 with HA crystals observed in globular appearance (such as shown in **Figure 2E**) were  
252 utilised for morphological quantification as discussed in the following section.

253

### 254 **3.3. Quantification of HA crystal size and enamel nanoroughness**

255 As a final step, AFM height images from all specimens were utilised to characterise the  
256 morphology of HA crystals across all individuals. In order to explore potential anatomical  
257 differences within enamel, associated to depth, data was obtained and analysed for  
258 both the external and internal areas of the tissue (as shown in **Figure 3A**). Overall, the  
259 mean HA width was found to mostly cluster between ~40-60 nm across all studied  
260 groups when the data is pooled from all specimens (**Figure 3B**). These results are  
261 consistent with early explorations by Habelitz et al. that also found crystals with a  
262 diameter of about 50nm in ground-and-polished enamel specimens<sup>28</sup>. When looking at  
263 the group pooled data, we observed a reduction in the diameter of HA crystals for the  
264 older specimens compared to younger enamel. Regarding this finding, Zheng et al.  
265 observed a reduction in the diameter of HA crystals from worn human enamel surfaces  
266 compared to control enamel<sup>19</sup>. Therefore, our observations may be representative of the  
267 increased wear expected for older teeth that have been bearing complex force loads  
268 within the oral cavity for decades. This is partially believed to be a result of the breaking  
269 of HA crystals into smaller ones due to mechanical action as a means to dissipate  
270 forces and avoid fracture propagation towards deeper areas of the tooth<sup>29</sup>. Therefore,  
271 the reduction of HA crystal width would be expected to occur mostly in the external  
272 region of enamel, as shown by our findings. Interestingly, individual variations can be  
273 seen within each sample group, particularly among specimens obtained from older tooth

274 samples that display a higher heterogeneity across specimens from different individuals  
275 at both the external and internal enamel locations (**Figure 3C**).

276

277 Subsequently, the surface roughness of enamel from different specimens was  
278 determined with nanoprofilometry derived from AFM height scans. Overall, the RMS  
279 values for enamel ranged between ~5-30 nm across all analysed samples, which are  
280 consistent with previous reports in the literature. For example, Lechner et al. reported  
281 RMS values of <20 nm for control human incisor enamel samples before  
282 demineralisation<sup>30</sup> and Quartarone et al. reported the average RMS roughness for  
283 human enamel to be 50nm<sup>31</sup>. In the present work, we observed a higher surface  
284 roughness for the external enamel region in older specimens compared to the younger  
285 ones (**Figure 3D**). It has previously been discussed that the increase of enamel surface  
286 roughness can be a result of erosive processes due to the consumption of acidic foods  
287 and beverages<sup>30</sup>. Therefore, it remains possible that these age-associated changes are  
288 a result of chronic exposure of teeth to erosion over time. This is particularly  
289 strengthened by the fact that significant differences in roughness were only observed in  
290 external enamel, immediately adjacent to the surface of the tooth, and are not  
291 observable in the deeper regions of enamel (**Figure 3D**). Also, younger teeth showed  
292 remarkable similarity for their surface roughness across all three individual samples  
293 (**Figure 3E**). The opposite was observed for older specimens, where important  
294 differences were found among individual samples, particularly associated to the internal  
295 enamel region that displayed a decrease in surface roughness with increasing ages  
296 across the three analysed specimens (**Figure 3E**). As this behaviour is observed only in

297 the internal enamel region, it is not believed to be strongly associated to external factors  
298 as is the case with sub-superficial enamel. However, the reduced number of samples  
299 (n=3) makes it difficult to determine if this pattern is coincidental, and further work  
300 should employ an increased number of specimens across multiple age-groups in order  
301 to clarify this observation. Nevertheless, these results confirm the important differences  
302 that exist among individuals and biological tissues in *ex-vivo* experiments, and highlight  
303 the multifactorial nature of ageing across different individuals.

304  
305 Overall, this work was an initial exploratory study – with a limited sample size - to  
306 determine potential differences in enamel topography, HA crystal size, and surface  
307 roughness at the nanoscale associated with ageing. Furthermore, the optimisation of  
308 AFM-based approaches for the characterisation of nanoscale qualitative and  
309 quantitative changes in enamel is crucial towards future studies with higher sample  
310 sizes across populations. In this context, AFM has proven to be a powerful tool for the  
311 reproducible ultrastructural characterisation of enamel from human dental specimens  
312 with nanoscale precision. Furthermore, the possibility of obtaining a range of qualitative  
313 and quantitative information from each surface scan (i.e., topographical  
314 characterisation, surface roughness, and HA crystal dimensions) allows for a  
315 multiparametric analysis of dental enamel across a range of individuals and specimens  
316 with no additional sample preparation. This can preserve the native properties of tissues  
317 compared to other microscopy-based approaches and allows a better translation of lab-  
318 based results into the clinics.

319

320 In this report, our AFM-based technique was utilised to compare different regions of  
321 enamel across a small number of individuals from two different age groups, suggesting  
322 that older enamel may display particular ageing markers that could play an important  
323 role – for example - in restorative dentistry approaches. However, it is important to  
324 consider that changes in dental tissues associated to ageing are multifactorial, and may  
325 involve several molecular, mechanical, and biological alterations over time<sup>32</sup>.  
326 Furthermore, individual differences must be considered when analysing the resulting  
327 data, particularly as the process of ageing is not uniform across individuals and may  
328 have important differences from a person-to-person basis. Therefore, future work  
329 should focus on exploring the ageing of mineralised dental tissues – including enamel -  
330 across larger sample sizes in order to compensate for individual differences as well as  
331 other potential confounding factors such as behavioural habits and mechanical forces,  
332 among others.

333

#### 334 **4. Conclusion:**

335 AFM was an effective approach for the characterisation and quantification of human  
336 dental enamel ultrastructure at high resolution (nanometre range), in a non-destructive  
337 manner and with minimal sample preparation. Despite individual variations in the  
338 morphology, size of HA crystals, and surface roughness across samples, older enamel  
339 specimens displayed and overall reduced HA size and increased surface roughness in  
340 the sub-surface (external) region of the tissue compared to younger enamel. This work  
341 further confirms the need to consider individual variations when characterising and



342 quantifying age-associated changes in tissues including mineralised dental tissues such  
343 as enamel.

344

345

346

## 347 **5. Acknowledgments:**

348 This work was supported by the ANID FONDECYT Iniciación Grant #11180101 and  
349 Millennium Science Initiative #P10-035F. The authors would also like to thank Camila  
350 Ramos and Dr. Gonzalo Narea for their support with tooth sample collection.

351

## 352 **6. References:**

- 353 1. Lacruz, R. S., Habelitz, S., Wright, J. T. & Paine, M. L. (2017) Dental enamel  
354 formation and implications for oral health and disease. *Physiological reviews* **97**,  
355 939–993.
- 356 2. Simmer, J. P. & Fincham, A. G. (1995) Molecular Mechanisms of Dental Enamel  
357 Formation. *Critical Reviews in Oral Biology & Medicine* **6**, 84–108.
- 358 3. Bartlett, J. D. *et al.* (2006) Protein–Protein Interactions of the Developing Enamel  
359 Matrix. in *Current Topics in Developmental Biology* vol. 74 57–115 (Academic  
360 Press, 2006).
- 361 4. Bidlack, F. B., Huynh, C., Marshman, J. & Goetze, B. (2014) Helium ion  
362 microscopy of enamel crystallites and extracellular tooth enamel matrix. *Frontiers*  
363 *in Physiology* **5**, 395.
- 364 5. Besnard, C. *et al.* (2021) Analysis of in vitro demineralised human enamel using

- 365 multi-scale correlative optical and scanning electron microscopy, and high-  
366 resolution synchrotron wide-angle X-ray scattering. *Materials & Design* **206**,  
367 109739.
- 368 6. Lubarsky, G. V, D'Sa, R. A., Deb, S., Meenan, B. J. & Lemoine, P. (2012) The  
369 role of enamel proteins in protecting mature human enamel against acidic  
370 environments: a double layer force spectroscopy study. *Biointerphases* **7**, 14.
- 371 7. Daculsi, G. & Kerebel, B. (1978) High-resolution electron microscope study of  
372 human enamel crystallites: Size, shape, and growth. *Journal of Ultrastructure*  
373 *Research* **65**, 163–172.
- 374 8. Beniash, E. *et al.* (2019) The hidden structure of human enamel. *Nature*  
375 *Communications* **10**, 4383.
- 376 9. Sato, T., Takagaki, T., Hatayama, T., Nikaido, T. & Tagami, J. (2021) Update on  
377 Enamel Bonding Strategies . *Frontiers in Dental Medicine* vol. 2.
- 378 10. Hillmann, G. & Geurtsen, W. (1997) Light-microscopical investigation of the  
379 distribution of extracellular matrix molecules and calcifications in human dental  
380 pulps of various ages. *Cell and Tissue Research* **289**, 145–154.
- 381 11. Shinno, Y. *et al.* (2016) Comprehensive analyses of how tubule occlusion and  
382 advanced glycation end-products diminish strength of aged dentin. *Scientific*  
383 *Reports* **6**,.
- 384 12. Gautier, H. O. B. *et al.* (2015) Chapter 12 - Atomic force microscopy-based force  
385 measurements on animal cells and tissues. in *Methods in Cell Biology* (ed.  
386 Paluch, E. K.) vol. 125 211–235 (Academic Press, 2015).
- 387 13. Stylianou, A., Kontomaris, S.-V., Grant, C. & Alexandratou, E. (2019) Atomic

- 388 Force Microscopy on Biological Materials Related to Pathological Conditions.  
389 *Scanning* **2019**, 8452851.
- 390 14. Ando, T., Uchihashi, T. & Kodera, N. (2013) High-speed AFM and applications to  
391 biomolecular systems. *Annual review of biophysics* **42**, 393–414.
- 392 15. Aguayo, S. & Bozec, L. (2016) *Mechanics of bacterial cells and initial surface*  
393 *colonisation. Advances in Experimental Medicine and Biology* vol. 915 (2016).
- 394 16. Torres-Gallegos, I. *et al.* (2012) Enamel roughness and depth profile after  
395 phosphoric acid etching of healthy and fluorotic enamel. *Australian Dental Journal*  
396 **57**, 151–156.
- 397 17. Poggio, C., Ceci, M., Beltrami, R., Lombardini, M. & Colombo, M. (2014) Atomic  
398 force microscopy study of enamel remineralization. *Annali di stomatologia* **5**, 98–  
399 102.
- 400 18. Meredith, L., Farella, M., Lowrey, S., Cannon, R. D. & Mei, L. (2017) Atomic force  
401 microscopy analysis of enamel nanotopography after interproximal reduction.  
402 *American Journal of Orthodontics and Dentofacial Orthopedics* **151**, 750–757.
- 403 19. Zheng, J. *et al.* (2013) Microtribological behaviour of human tooth enamel and  
404 artificial hydroxyapatite. *Tribology International* **63**, 177–185.
- 405 20. Chawhuaveang, D. D. *et al.* (2021) Acquired salivary pellicle and oral diseases: A  
406 literature review. *Journal of Dental Sciences* **16**, 523–529.
- 407 21. Siqueira, W. L., Custodio, W. & McDonald, E. E. (2012) New Insights into the  
408 Composition and Functions of the Acquired Enamel Pellicle. *Journal of Dental*  
409 *Research* **91**, 1110–1118.
- 410 22. Donovan, T., Nguyen-Ngoc, C., Abd Alraheam, I. & Iruosa, K. (2021)

- 411 Contemporary diagnosis and management of dental erosion. *Journal of Esthetic*  
412 *and Restorative Dentistry* **33**, 78–87.
- 413 23. Pitts, N. B. *et al.* (2017) Dental caries. *Nature Reviews Disease Primers* **3**,.  
414 24. Xiao, H. *et al.* (2021) Protective effects of two food hydrocolloids on dental  
415 erosion: Nanomechanical properties and microtribological behavior study. *Friction*  
416 **9**, 356–366.
- 417 25. Bertacci, A., Lucchese, A., Taddei, P., Gherlone, E. F. & Chersoni, S. (2014)  
418 Enamel Structural Changes induced by Hydrochloric and Phosphoric Acid  
419 Treatment. *Journal of Applied Biomaterials & Functional Materials* **12**, 240–247.
- 420 26. Zhu, J. J., Tang, A. T. H., Matinlinna, J. P. & Hägg, U. (2014) Acid etching of  
421 human enamel in clinical applications: A systematic review. *The Journal of*  
422 *Prosthetic Dentistry* **112**, 122–135.
- 423 27. Daculsi, G., Menanteau, J., Kerebel, L. M. & Mitre, D. (1984) Length and shape of  
424 enamel crystals. *Calcified Tissue International* **36**, 550–555.
- 425 28. Habelitz, S., Marshall, S. J., Marshall, G. W. & Balooch, M. (2001) Mechanical  
426 properties of human dental enamel on the nanometre scale. *Archives of Oral*  
427 *Biology* **46**, 173–183.
- 428 29. Zheng, S. Y. *et al.* (2011) Investigation on the microtribological behaviour of  
429 human tooth enamel by nanoscratch. *Wear* **271**, 2290–2296.
- 430 30. Lechner, B.-D., Röper, S., Messerschmidt, J., Blume, A. & Magerle, R. (2015)  
431 Monitoring Demineralization and Subsequent Remineralization of Human Teeth at  
432 the Dentin–Enamel Junction with Atomic Force Microscopy. *ACS Applied*  
433 *Materials & Interfaces* **7**, 18937–18943.

- 434 31. Quartarone, E., Mustarelli, P., Poggio, C. & Lombardini, M. (2008) Surface kinetic  
435 roughening caused by dental erosion: An atomic force microscopy study. *Journal*  
436 *of Applied Physics* **103**, 104702.
- 437 32. Schuh, C. M. A. P. *et al.* (2022) Nanomechanical and Molecular Characterization  
438 of Aging in Dentinal Collagen. *Journal of Dental Research* 00220345211072484  
439 doi:10.1177/00220345211072484.

440

441

442

443

444

445

446

447

448

449

450

451

452

453

454

455

456

457

458

459

460

461

462

463

464

465

466 **Figure legends:**

467

468 **Figure 1: Ultrastructure of superficial dental human enamel.** (A) Height, (B)  
469 amplitude, (C) phase contrast, and (D) 3D reconstruction images of the superficial  
470 enamel layer (in contact with the oral environment), where the presence of a biological  
471 pellicle-like structure is observable. (E) Height and (F) amplitude images of cleaned  
472 superficial enamel from a younger specimen, showing the characteristic globular  
473 morphology associated to the presence of hydroxyapatite crystals. (G) Height and (H)  
474 amplitude surfaces in an older sample, displaying a less-defined surface morphology.

475

476 **Figure 2: Ultrastructure of hydroxyapatite crystals within human enamel slices**  
477 **following phosphoric acid etching.** While in (A) and (B) mineral is mostly removed  
478 from the center of enamel rods, (C) and (D) display removal from mostly the interrod  
479 area (scale bars A, C: 10 $\mu$ m; B, D: 5 $\mu$ m). Thus, apatite crystals can be exposed either  
480 transversally or longitudinally according to their orientation for AFM visualisation. (E)  
481 Amplitude and (F) 3D height reconstruction of HA crystals exposed by acid etching (1x1  
482  $\mu$ m scans) in transversal orientation. (G) 3D reconstruction of a 250x250nm area of  
483 enamel, confirming the globular aspect of HA crystals. (H) Surface profile obtained atop

484 an HA crystal confirming the globular morphology. (I) Amplitude and (J) 3D height  
485 reconstruction of HA crystals exposed longitudinally during sample preparation (1x1  $\mu\text{m}$   
486 scans). (K) 3D reconstruction of a 250x250 nm area of enamel, on which the (L) surface  
487 profile on a single transversal HA crystal was obtained.

488

489

490 **Figure 3: Exploring age-associated quantitative changes in human enamel apatite**

491 **crystals with AFM.** (A) Light microscopy image of a tooth specimen showing the  
492 anatomical association between enamel and the underlying dentin layer (scale bar: 100  
493  $\mu\text{m}$ ). Analysis of enamel was performed at both the external (subsurface) as well as at  
494 the internal (vicinity of dentin) areas, as illustrated by the black boxes. (B) Pooled and  
495 (C) individual violin plots for HA crystal width at both external and internal locations of  
496 enamel for younger (Y) and older (O) specimens. (D) Pooled and (E) individual  
497 specimen violin plots for surface roughness (RMS) at both the external and internal  
498 locations of enamel (\* $p < 0.05$ ; \*\* $p < 0.01$ ; \*\*\* $p < 0.001$ ; \*\*\*\* $p < 0.0001$ ; one-way ANOVA with  
499 Tukey's post-hoc).

500

Uncleaned superficial enamel

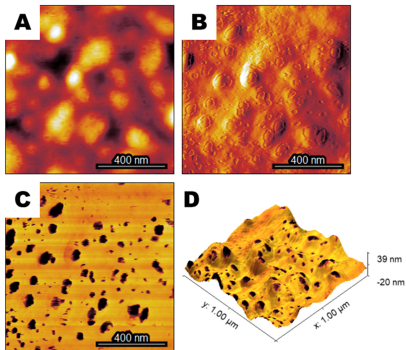

Cleaned superficial enamel

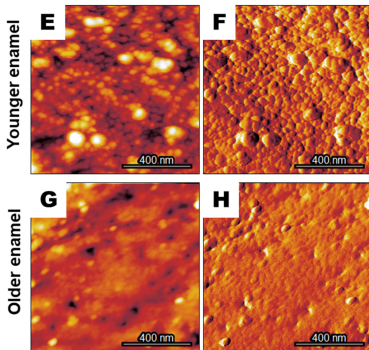



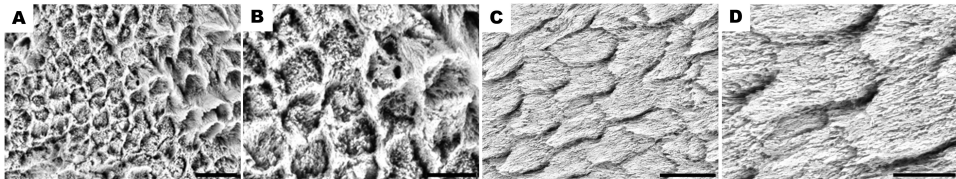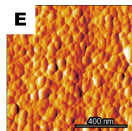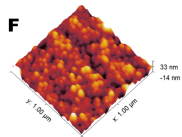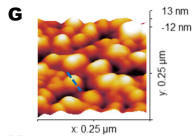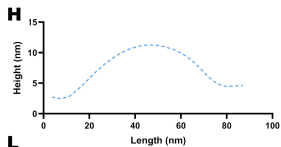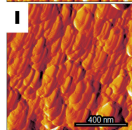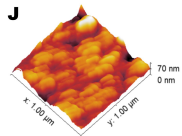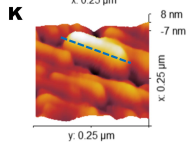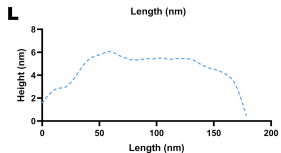

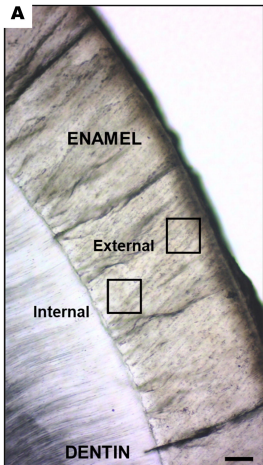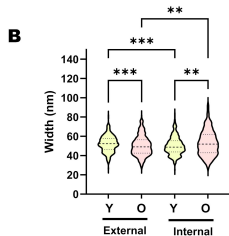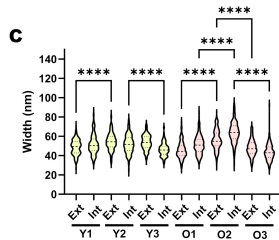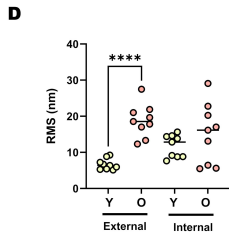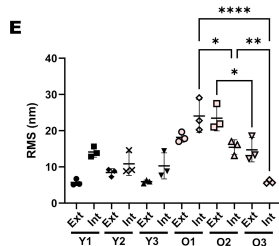

Source: https://medrxiv.org/content/medrxiv/early/2022/03/10/2022.03.09.22271977.full.pdf
